# Supplementary material
Source: PubMed Central journal article supplement (PMC6643781)
Supplement: ao7b00353_si_001.pdf [file ao7b00353_si_001.pdf]

## Supporting Information

# Role of Surface Hydrophobicity of Dicationic Amphiphiles Stabilized Gold Nanoparticles on A549 Lung Cancer Cells

Thangavel Muthukumarasamyvel,<sup>†</sup> Ganapathy Rajendran,<sup>‡</sup> Devendrapandi Santhana Panneer,<sup>†</sup>  
Jayapalan Kasthuri,<sup>§</sup> Krishnan Kathiravan,<sup>‡</sup> and Nagappan Rajendiran<sup>\*,†</sup>

<sup>†</sup>Department of Polymer Science, University of Madras, Guindy Campus, Chennai 600025,  
Tamil Nadu, India.

<sup>§</sup> Department of Chemistry, Quaid-E-Millath Government College for Women (Autonomous),  
Chennai 600002, Tamil Nadu, India.

<sup>‡</sup>Department of Biotechnology, University of Madras, Guindy Campus, Chennai 600025, Tamil  
Nadu, India.

Corresponding Author

\*Email: [nrajendiar@yahoo.com](mailto:nrajendiar@yahoo.com)

**Table S1. Size, Charge and Contact Angle Measurements of Amphiphiles Stabilized AuNPs.**

| <b>Species</b> | <b>Contact angle</b>       |                             | <b>AuNPs Size (nm)</b> |            | <b>Zeta potential (mV)</b> |
|----------------|----------------------------|-----------------------------|------------------------|------------|----------------------------|
|                | <b>In absence of AuNPs</b> | <b>In presence of AuNPs</b> | <b>TEM</b>             | <b>DLS</b> |                            |
| <b>DCaC</b>    | 51.8°                      | 53.6°                       | 22±0.5                 | 47.12      | + 20.30                    |
| <b>DCaDC</b>   | 53.6°                      | 56.4°                       | 23±0.8                 | 44.43      | +31.54                     |
| <b>DCaLC</b>   | 58.3°                      | 61.8°                       | 20±3                   | 45.58      | +25.29                     |
